# Supplementary material
Source: PubMed Central journal article supplement (PMC5418126)
Supplement: NIHMS854830-supplement-supplement_1.pdf [file NIHMS854830-supplement-supplement_1.pdf]

## **Supplemental Material**

**Supplemental Figure 1. Event rate for CRT-D patients by binned PR interval.** A plot of the unadjusted incidence of heart failure hospitalization or death among CRT-D patients divided into subgroups based on PR interval using 10ms bins. The plot was fit with a linear spline function with a single knot at 170ms.

**Supplemental Figure 2. The unadjusted and adjusted associations between PR interval (across the continuous range) and outcomes among CRT-D patients.** Unadjusted and adjusted restricted cubic splines (with 5 knots at 5th, 25th, 50th, 75th, and 90<sup>th</sup> percentiles) depicting the association between PR interval and (log hazard) risk for HF hospitalization or death (**a**, unadjusted; **b**, adjusted), death (**c**, unadjusted; **d**, adjusted) and HF hospitalization (**e**, unadjusted; **f**, adjusted).

**Supplemental Table 1.** The baseline characteristics of the inverse probability weighted patient groups used for the primary comparative effectiveness analysis.

| Variables                           | PR<230ms |        |                           | PR≥230ms |        |                           |
|-------------------------------------|----------|--------|---------------------------|----------|--------|---------------------------|
|                                     | ICD      | CRT    | % Standardized difference | ICD      | CRT    | % Standardized difference |
| Age (Mean)                          | 75.1     | 75.2   | -1.36                     | 76.9     | 76.9   | -0.69                     |
| Gender                              |          |        |                           |          |        |                           |
| Male                                | 63.30%   | 64.80% | -3.12                     | 80.30%   | 82.50% | -5.51                     |
| Female                              | 36.70%   | 35.20% | 3.12                      | 19.70%   | 17.50% | 5.51                      |
| Race                                |          |        |                           |          |        |                           |
| White non-Hispanic                  | 86.30%   | 86.80% | -1.31                     | 88.10%   | 89.60% | -4.48                     |
| Black non-Hispanic                  | 7.60%    | 7.30%  | 1.27                      | 7.00%    | 5.90%  | 4.34                      |
| Hispanic                            | 4.20%    | 4.00%  | 0.9                       | 3.60%    | 2.60%  | 5.45                      |
| Other                               | 1.90%    | 1.90%  | -0.47                     | 1.30%    | 1.90%  | -4.72                     |
| QRS duration                        |          |        |                           |          |        |                           |
| 120-129                             | 13.70%   | 14.00% | -0.8                      | 11.80%   | 12.40% | -1.8                      |
| 130-139                             | 14.50%   | 15.00% | -1.34                     | 15.20%   | 14.30% | 2.45                      |
| 140-149                             | 18.10%   | 17.90% | 0.35                      | 14.70%   | 15.30% | -1.78                     |
| 150-159                             | 18.30%   | 18.10% | 0.75                      | 15.80%   | 14.90% | 2.33                      |
| 160-169                             | 16.00%   | 16.70% | -1.81                     | 19.00%   | 17.20% | 4.6                       |
| ≥170                                | 19.40%   | 18.40% | 2.54                      | 23.60%   | 25.90% | -5.23                     |
| Intraventricular Conduction         |          |        |                           |          |        |                           |
| Non-LBBB                            | 30.40%   | 31.10% | -1.48                     | 37.20%   | 37.70% | -1.02                     |
| LBBB                                | 69.60%   | 68.90% | 1.48                      | 62.80%   | 62.30% | 1.02                      |
| Non-Ischemic Dilated Cardiomyopathy |          |        |                           |          |        |                           |
| No                                  | 62.80%   | 63.80% | -2.06                     | 70.70%   | 73.50% | -6.15                     |
| Yes-Within the past 9 months        | 11.40%   | 11.60% | -0.51                     | 8.50%    | 7.50%  | 3.74                      |
| Yes-Greater than 9 months           | 25.80%   | 24.70% | 2.66                      | 20.80%   | 19.00% | 4.37                      |
| Ischemic Heart Disease              | 64.70%   | 65.70% | -2.26                     | 71.40%   | 74.70% | -7.26                     |
| Atrial Fibrillation/Atrial Flutter  | 17.00%   | 17.50% | -1.38                     | 27.70%   | 27.70% | 0.02                      |
| Ventricular Tachycardia             | 16.50%   | 16.80% | -0.74                     | 20.00%   | 20.10% | -0.28                     |
| Primary prevention                  | 94.70%   | 94.70% | -0.21                     | 94.40%   | 94.30% | 0.4                       |
| NYHA class                          |          |        |                           |          |        |                           |
| I                                   | 4.90%    | 5.10%  | -0.67                     | 4.20%    | 4.30%  | -0.32                     |
| II                                  | 24.20%   | 24.60% | -1.08                     | 24.50%   | 24.60% | -0.36                     |
| III                                 | 68.00%   | 67.60% | 0.84                      | 68.90%   | 68.00% | 1.95                      |
| IV                                  | 2.90%    | 2.70%  | 1.32                      | 2.40%    | 3.10%  | -4.19                     |
| Previous PCI                        | 32.30%   | 32.60% | -0.52                     | 33.80%   | 34.20% | -0.96                     |
| Previous CABG                       | 38.10%   | 38.10% | 0.12                      | 48.20%   | 50.10% | -3.92                     |
| Diabetes                            | 37.30%   | 37.40% | -0.27                     | 44.90%   | 42.00% | 5.88                      |
| Previous MI                         | 50.50%   | 51.70% | -2.38                     | 54.10%   | 58.60% | -9.01                     |
| Chronic Lung Disease                | 23.90%   | 23.10% | 1.99                      | 18.80%   | 20.40% | -3.96                     |
| Cerebrovascular Disease             | 14.10%   | 14.80% | -2.04                     | 16.50%   | 17.60% | -2.98                     |
| Renal Failure-Dialysis              | 2.40%    | 2.60%  | -1.35                     | 3.20%    | 3.20%  | -0.13                     |
| Cardiac Arrest                      | 2.30%    | 2.00%  | 2.07                      | 1.50%    | 2.90%  | -9.68                     |
| Hypertension                        | 77.80%   | 77.90% | -0.3                      | 80.50%   | 80.20% | 0.81                      |
| Syncope                             | 11.00%   | 10.30% | 2.47                      | 13.20%   | 11.00% | 6.68                      |
| CHF Duration                        |          |        |                           |          |        |                           |

|                                         |        |        |       |        |        |       |
|-----------------------------------------|--------|--------|-------|--------|--------|-------|
| No                                      | 9.60%  | 10.00% | -1.62 | 8.50%  | 9.20%  | -2.62 |
| Less than 9 months                      | 26.10% | 25.80% | 0.77  | 22.70% | 22.70% | 0.12  |
| Greater than 9 months                   | 64.30% | 64.20% | 0.3   | 68.80% | 68.10% | 1.49  |
| EF %                                    | 24.4   | 24.7   | -3.87 | 25.2   | 25.2   | -1.04 |
| GFR                                     |        |        |       |        |        |       |
| ≥60                                     | 42.40% | 42.70% | -0.55 | 36.50% | 37.30% | -1.46 |
| 30-59                                   | 48.10% | 48.00% | 0.24  | 52.20% | 51.20% | 2.03  |
| 15-29                                   | 6.70%  | 6.20%  | 1.81  | 8.00%  | 8.20%  | -0.65 |
| <15                                     | 2.80%  | 3.10%  | -1.72 | 3.30%  | 3.40%  | -0.75 |
| BUN Level                               |        |        |       |        |        |       |
| ≤ 20                                    | 42.60% | 43.50% | -1.74 | 33.30% | 34.20% | -1.84 |
| 20-40                                   | 46.90% | 47.10% | -0.29 | 54.00% | 52.00% | 4.15  |
| >40                                     | 10.50% | 9.50%  | 3.37  | 12.70% | 13.90% | -3.55 |
| Sodium Level                            |        |        |       |        |        |       |
| ≤ 135                                   | 12.90% | 12.50% | 1.13  | 12.70% | 13.10% | -1.17 |
| 135-145                                 | 85.60% | 86.20% | -1.84 | 85.60% | 85.20% | 0.94  |
| >145                                    | 1.50%  | 1.20%  | 2.27  | 1.70%  | 1.70%  | 0.46  |
| Systolic BP                             |        |        |       |        |        |       |
| ≤ 100                                   | 5.50%  | 5.30%  | 0.62  | 5.20%  | 5.10%  | 0.46  |
| 100-130                                 | 41.80% | 41.50% | 0.63  | 37.40% | 40.50% | -6.28 |
| >130                                    | 52.70% | 53.20% | -0.9  | 57.30% | 54.40% | 5.96  |
| Angiotensin converting enzyme inhibitor | 60.70% | 60.70% | 0.1   | 59.20% | 58.40% | 1.76  |
| Amiodarone                              | 7.90%  | 7.80%  | 0.16  | 15.40% | 14.90% | 1.53  |
| Hydralazine                             | 3.80%  | 3.70%  | 0.72  | 4.00%  | 4.60%  | -2.59 |
| Angiotensin receptor blocker            | 20.10% | 20.80% | -1.81 | 21.10% | 22.40% | -3.22 |
| Aspirin                                 | 69.90% | 72.50% | -5.74 | 70.50% | 72.50% | -4.52 |
| Beta-blocker                            | 86.20% | 87.00% | -2.31 | 83.40% | 84.80% | -3.63 |
| Warfarin                                | 16.50% | 16.40% | 0.11  | 24.10% | 23.60% | 1.1   |
| Digoxin                                 | 21.80% | 21.50% | 0.79  | 23.60% | 25.50% | -4.45 |
| Diuretic                                | 67.40% | 67.80% | -0.77 | 72.60% | 72.20% | 0.88  |
| Long acting nitrate                     | 11.50% | 11.50% | 0.09  | 12.20% | 13.40% | -3.42 |
| Clopidogrel                             | 24.20% | 23.80% | 0.92  | 22.20% | 23.80% | -3.67 |
| Statin                                  | 65.80% | 67.80% | -4.45 | 70.90% | 70.40% | 1     |
| Dementia                                | 2.50%  | 3.00%  | -2.69 | 2.80%  | 2.90%  | -0.82 |
| Disability/frailty                      | 6.50%  | 6.30%  | 1.06  | 7.00%  | 7.10%  | -0.16 |
| EP operator ICD training                |        |        |       |        |        |       |
| Board-certified EP/EP fellowship        | 79.60% | 78.50% | 2.74  | 82.40% | 80.70% | 4.47  |
| Surgery board                           | 1.20%  | 1.10%  | 1.17  | 1.00%  | 1.40%  | -3.59 |
| Other                                   | 19.10% | 20.40% | -3.12 | 16.60% | 17.90% | -3.55 |
| Operator CRT volume                     |        |        |       |        |        |       |
| ≤20implants/year                        | 56.70% | 56.00% | 1.53  | 58.20% | 55.40% | 5.82  |
| >20implants/year                        | 43.30% | 44.00% | -1.53 | 41.80% | 44.60% | -5.82 |
| Region                                  |        |        |       |        |        |       |
| Other                                   | 2.70%  | 2.50%  | 0.96  | 3.10%  | 2.90%  | 1.2   |
| New England                             | 4.30%  | 4.20%  | 0.5   | 5.00%  | 4.20%  | 3.68  |
| Atlantic                                | 35.30% | 33.60% | 3.71  | 36.00% | 32.10% | 8.27  |
| Central                                 | 45.30% | 47.50% | -4.37 | 44.20% | 48.10% | -7.84 |
| Mountain                                | 4.40%  | 4.20%  | 0.92  | 3.80%  | 4.00%  | -0.96 |
| Pacific                                 | 8.00%  | 8.00%  | -0.1  | 7.90%  | 8.70%  | -2.92 |
| Teaching status                         |        |        |       |        |        |       |
| Council of teaching hospitals           | 28.20% | 28.20% | -0.12 | 30.10% | 26.70% | 7.46  |

|                         |        |        |       |        |        |       |
|-------------------------|--------|--------|-------|--------|--------|-------|
| Teaching hospital       | 27.80% | 28.20% | -0.96 | 26.20% | 28.80% | -5.96 |
| Not teaching hospital   | 44.10% | 43.60% | 0.98  | 43.80% | 44.50% | -1.42 |
| Center CRT volume       |        |        |       |        |        |       |
| ≤20implants/year        | 10.00% | 10.10% | -0.33 | 7.30%  | 7.90%  | -2.31 |
| >20implants/year        | 90.00% | 89.90% | 0.33  | 92.70% | 92.10% | 2.31  |
| Beds set up and staffed |        |        |       |        |        |       |
| ≤100                    | 5.20%  | 5.30%  | -0.64 | 4.40%  | 5.90%  | -6.6  |
| 100-500                 | 60.80% | 60.40% | 0.85  | 64.80% | 62.10% | 5.6   |
| >500                    | 34.00% | 34.30% | -0.57 | 30.80% | 32.00% | -2.67 |
| Implant year            |        |        |       |        |        |       |
| 2006                    | 18.20% | 17.60% | 1.39  | 19.80% | 18.20% | 4.11  |
| 2007                    | 19.40% | 19.00% | 1.11  | 19.80% | 21.80% | -4.73 |
| 2008                    | 20.40% | 22.10% | -4.29 | 21.10% | 21.10% | 0.02  |
| 2009                    | 22.00% | 21.70% | 0.69  | 19.30% | 21.10% | -4.57 |
| 2010                    | 20.10% | 19.60% | 1.25  | 20.00% | 17.80% | 5.45  |

BUN = blood urea nitrogen, BP = blood pressure, CABG = coronary artery bypass grafting, CHF = congestive heart failure, EF = ejection fraction, GFR = glomerular filtration rate, LBBB = left bundle branch block, MI = myocardial infarction, NYHA = New York Heart Association, PCI = percutaneous coronary intervention

**Supplemental Table 2.** Multivariable adjusted\* association between CRT-D vs. ICD and outcomes among patients when stratified by PR interval

|                             | <b>PR&gt;230ms</b>      |                | <b>PR≥230ms</b>         |                |
|-----------------------------|-------------------------|----------------|-------------------------|----------------|
| <b>Endpoint</b>             | <b>HR/SHR 95%CI</b>     | <b>P-value</b> | <b>HR/SHR 95%CI</b>     | <b>P-value</b> |
| HF Hospitalization or death | 0.819 ( 0.769 - 0.873 ) | <0.0001        | 0.926 ( 0.815 - 1.051 ) | 0.24           |
| Death                       | 0.806 ( 0.747 - 0.870 ) | <0.0001        | 0.867 ( 0.743 - 1.012 ) | 0.07           |
| HF Hospitalization          | 0.860 ( 0.795 - 0.931 ) | 0.0002         | 0.924 ( 0.791 - 1.079 ) | 0.32           |

\*Fully adjusted model including an interaction term for device type and PR interval  
 CRT-D = cardiac resynchronization therapy with defibrillator, confidence interval = CI, Hazard ratio = HR, HF = heart failure, implantable cardioverter defibrillator = ICD, SHR = subdistribution hazard ratio

**Supplemental Table 3.** The baseline characteristics of the inverse probability weighted patient groups used for the comparative effectiveness analysis assessing patients with a LBBB QRS morphology.

| Variables                           | PR<230ms |        |                           | PR≥230ms |        |                           |
|-------------------------------------|----------|--------|---------------------------|----------|--------|---------------------------|
|                                     | ICD      | CRT    | % Standardized difference | ICD      | CRT    | % Standardized difference |
| Age (Mean)                          | 75.1     | 75.2   | -1.15                     | 76.7     | 76.9   | -4.22                     |
| Gender                              |          |        |                           |          |        |                           |
| Male                                | 56.20%   | 57.60% | -2.69                     | 75.40%   | 78.30% | -6.82                     |
| Female                              | 43.80%   | 42.40% | 2.69                      | 24.60%   | 21.70% | 6.82                      |
| Race                                |          |        |                           |          |        |                           |
| White non-Hispanic                  | 86.30%   | 87.10% | -2.41                     | 87.70%   | 89.50% | -5.66                     |
| Black non-Hispanic                  | 7.70%    | 7.20%  | 1.75                      | 8.00%    | 6.40%  | 6.3                       |
| Hispanic                            | 4.30%    | 3.90%  | 2.06                      | 3.30%    | 2.30%  | 6.37                      |
| Other                               | 1.80%    | 1.90%  | -0.34                     | 1.00%    | 1.90%  | -7.48                     |
| QRS duration                        |          |        |                           |          |        |                           |
| 120-129                             | 8.70%    | 8.90%  | -0.53                     | 7.20%    | 8.30%  | -4.08                     |
| 130-139                             | 11.60%   | 12.10% | -1.47                     | 11.50%   | 11.40% | 0.24                      |
| 140-149                             | 17.50%   | 17.70% | -0.71                     | 15.00%   | 15.60% | -1.72                     |
| 150-159                             | 20.00%   | 19.80% | 0.54                      | 15.00%   | 14.70% | 0.86                      |
| 160-169                             | 18.50%   | 19.10% | -1.51                     | 21.70%   | 19.50% | 5.45                      |
| ≥170                                | 23.70%   | 22.40% | 3.01                      | 29.60%   | 30.50% | -1.92                     |
| Non-Ischemic Dilated Cardiomyopathy |          |        |                           |          |        |                           |
| No                                  | 55.30%   | 55.90% | -1.31                     | 64.40%   | 67.80% | -7.08                     |
| Yes-Within the past 9 months        | 13.20%   | 13.50% | -0.66                     | 11.10%   | 9.00%  | 7.07                      |
| Yes-Greater than 9 months           | 31.50%   | 30.60% | 1.89                      | 24.50%   | 23.20% | 2.88                      |
| Ischemic HD                         | 57.10%   | 58.40% | -2.54                     | 67.00%   | 70.10% | -6.54                     |
| Atrial Fibrillation/Atrial Flutter  | 15.50%   | 16.00% | -1.45                     | 26.10%   | 27.70% | -3.57                     |
| Ventricular Tachycardia             | 15.30%   | 15.40% | -0.24                     | 19.00%   | 16.20% | 7.34                      |
| Primary prevention                  | 95.30%   | 95.70% | -1.59                     | 95.50%   | 95.70% | -0.71                     |
| NYHA class                          |          |        |                           |          |        |                           |
| I                                   | 3.90%    | 3.90%  | 0.07                      | 3.30%    | 3.10%  | 1.27                      |
| II                                  | 20.60%   | 21.00% | -0.92                     | 20.90%   | 21.10% | -0.45                     |
| III                                 | 72.20%   | 72.30% | -0.15                     | 73.20%   | 72.60% | 1.52                      |
| IV                                  | 3.30%    | 2.90%  | 2.46                      | 2.50%    | 3.20%  | -4.25                     |
| Previous PCI                        | 29.30%   | 29.30% | 0.03                      | 27.80%   | 31.50% | -8.26                     |
| Previous CABG                       | 32.10%   | 31.80% | 0.64                      | 41.00%   | 44.10% | -6.18                     |
| Diabetes                            | 36.00%   | 35.70% | 0.61                      | 44.80%   | 41.30% | 6.98                      |
| Previous MI                         | 43.50%   | 44.30% | -1.48                     | 48.20%   | 53.10% | -9.81                     |
| Chronic Lung Disease                | 23.70%   | 22.20% | 3.72                      | 16.20%   | 19.10% | -7.48                     |
| Cerebrovascular Disease             | 13.10%   | 13.70% | -1.79                     | 14.70%   | 15.90% | -3.23                     |
| Renal Failure-Dialysis              | 2.20%    | 2.40%  | -1.04                     | 3.40%    | 3.00%  | 2.58                      |
| Cardiac Arrest                      | 2.00%    | 1.60%  | 2.77                      | 0.70%    | 1.50%  | -7.5                      |
| Hypertension                        | 77.60%   | 77.40% | 0.48                      | 78.20%   | 78.00% | 0.59                      |
| Syncope                             | 11.00%   | 10.10% | 2.97                      | 12.20%   | 10.20% | 6.37                      |
| CHF Duration                        |          |        |                           |          |        |                           |
| No                                  | 7.40%    | 7.60%  | -0.76                     | 6.50%    | 6.70%  | -0.81                     |

|                                         |        |        |       |        |        |        |
|-----------------------------------------|--------|--------|-------|--------|--------|--------|
| Less than 9 months                      | 26.80% | 26.60% | 0.43  | 24.60% | 23.50% | 2.5    |
| Greater than 9 months                   | 65.80% | 65.80% | 0.02  | 68.90% | 69.70% | -1.88  |
| EF %                                    | 24     | 24.3   | -5.31 | 24.5   | 24.8   | -5.33  |
| GFR                                     |        |        |       |        |        |        |
| ≥60                                     | 42.40% | 42.20% | 0.35  | 36.60% | 36.20% | 0.72   |
| 30-59                                   | 47.80% | 48.60% | -1.66 | 51.50% | 52.20% | -1.41  |
| 15-29                                   | 7.20%  | 6.40%  | 3.3   | 8.40%  | 8.40%  | -0.19  |
| <15                                     | 2.60%  | 2.80%  | -1.07 | 3.60%  | 3.10%  | 2.29   |
| BUN Level                               |        |        |       |        |        |        |
| ≤ 20                                    | 42.60% | 43.40% | -1.6  | 32.90% | 34.90% | -4.31  |
| 20-40                                   | 46.40% | 47.00% | -1.29 | 54.20% | 51.60% | 5.17   |
| >40                                     | 11.00% | 9.60%  | 4.73  | 12.90% | 13.40% | -1.6   |
| Sodium Level                            |        |        |       |        |        |        |
| ≤ 135                                   | 12.90% | 12.30% | 1.66  | 12.80% | 12.80% | 0.05   |
| 135-145                                 | 85.90% | 86.50% | -1.81 | 85.30% | 85.60% | -0.86  |
| >145                                    | 1.20%  | 1.20%  | 0.65  | 1.90%  | 1.60%  | 2.19   |
| Systolic BP                             |        |        |       |        |        |        |
| ≤ 100                                   | 5.60%  | 5.10%  | 2.04  | 4.90%  | 4.80%  | 0.45   |
| 100-130                                 | 42.00% | 41.70% | 0.68  | 35.30% | 40.60% | -11.02 |
| >130                                    | 52.40% | 53.20% | -1.59 | 59.80% | 54.60% | 10.61  |
| Angiotensin converting enzyme inhibitor | 60.90% | 61.10% | -0.24 | 61.00% | 58.70% | 4.76   |
| Amiodarone                              | 7.40%  | 7.30%  | 0.31  | 16.50% | 14.10% | 6.43   |
| Hydralazine                             | 3.60%  | 3.60%  | 0     | 4.20%  | 4.90%  | -3.17  |
| Angiotensin receptor blocker            | 20.30% | 21.10% | -2    | 21.00% | 22.90% | -4.59  |
| Aspirin                                 | 67.80% | 71.10% | -7.08 | 66.70% | 71.00% | -9.15  |
| Beta-blocker                            | 86.40% | 87.60% | -3.67 | 84.60% | 86.40% | -5.24  |
| Warfarin                                | 14.80% | 15.20% | -0.87 | 23.10% | 23.80% | -1.55  |
| Digoxin                                 | 21.70% | 21.80% | -0.25 | 24.00% | 26.40% | -5.41  |
| Diuretic                                | 68.20% | 68.40% | -0.47 | 73.10% | 72.60% | 1.08   |
| Long acting nitrate                     | 10.60% | 10.80% | -0.63 | 9.80%  | 12.40% | -8.33  |
| Clopidogrel                             | 22.40% | 21.90% | 1.28  | 17.50% | 21.90% | -11.11 |
| Statin                                  | 62.80% | 65.80% | -6.07 | 67.90% | 68.20% | -0.65  |
| Dementia                                | 2.50%  | 2.70%  | -1.3  | 3.40%  | 2.90%  | 2.71   |
| Disability/frailty                      | 6.00%  | 5.80%  | 0.72  | 7.50%  | 6.10%  | 5.3    |
| EP operator ICD training                |        |        |       |        |        |        |
| Board-certified EP/EP fellowship        | 80.50% | 80.10% | 0.95  | 84.10% | 82.40% | 4.53   |
| Surgery board                           | 1.20%  | 1.10%  | 1.31  | 1.30%  | 0.90%  | 3.5    |
| Other                                   | 18.30% | 18.80% | -1.32 | 14.60% | 16.70% | -5.66  |
| Operator CRT volume                     |        |        |       |        |        |        |
| ≤20 implants/year                       | 56.70% | 55.00% | 3.48  | 60.20% | 54.60% | 11.38  |
| >20 implants/year                       | 43.30% | 45.00% | -3.48 | 39.80% | 45.40% | -11.38 |
| Region                                  |        |        |       |        |        |        |
| Other                                   | 2.80%  | 2.70%  | 0.62  | 3.50%  | 3.40%  | 0.63   |
| New England                             | 4.70%  | 4.60%  | 0.4   | 5.70%  | 4.50%  | 5.18   |
| Atlantic                                | 35.90% | 33.40% | 5.37  | 38.00% | 32.00% | 12.59  |
| Central                                 | 43.90% | 46.80% | -5.84 | 42.10% | 47.60% | -11.06 |
| Mountain                                | 4.40%  | 4.30%  | 0.66  | 4.30%  | 4.40%  | -0.55  |
| Pacific                                 | 8.30%  | 8.20%  | 0.1   | 6.30%  | 8.00%  | -6.37  |
| Teaching status                         |        |        |       |        |        |        |
| Council of teaching hospitals           | 27.90% | 29.00% | -2.4  | 33.70% | 28.40% | 11.56  |
| Teaching hospital                       | 28.00% | 28.20% | -0.48 | 24.80% | 28.00% | -7.42  |
| Not teaching hospital                   | 44.10% | 42.80% | 2.62  | 41.50% | 43.60% | -4.2   |
| Center CRT volume                       |        |        |       |        |        |        |
| ≤20 implants/year                       | 9.70%  | 9.30%  | 1.45  | 6.10%  | 7.80%  | -6.74  |
| >20 implants/year                       | 90.30% | 90.70% | -1.45 | 93.90% | 92.20% | 6.74   |
| Beds set up and staffed                 |        |        |       |        |        |        |



|              |        |        |       |        |        |        |
|--------------|--------|--------|-------|--------|--------|--------|
| <=100        | 4.70%  | 5.20%  | -2.2  | 3.10%  | 5.70%  | -12.84 |
| 100-500      | 61.30% | 59.80% | 3.12  | 66.80% | 60.60% | 13.07  |
| >500         | 34.00% | 35.00% | -2.21 | 30.10% | 33.70% | -7.82  |
| Implant year |        |        |       |        |        |        |
| 2006         | 18.50% | 18.00% | 1.16  | 21.20% | 19.40% | 4.37   |
| 2007         | 18.70% | 18.70% | 0.03  | 17.50% | 21.20% | -9.27  |
| 2008         | 19.50% | 21.80% | -5.81 | 20.40% | 21.20% | -2.03  |
| 2009         | 21.80% | 21.70% | 0.33  | 17.40% | 19.60% | -5.89  |
| 2010         | 21.60% | 19.80% | 4.34  | 23.60% | 18.60% | 12.3   |

BUN = blood urea nitrogen, BP = blood pressure, CABG = coronary artery bypass grafting, CHF = congestive heart failure, EF = ejection fraction, GFR = glomerular filtration rate, LBBB = left bundle branch block, MI = myocardial infarction, NYHA = New York Heart Association, PCI = percutaneous coronary intervention

**Supplemental Table 4.** The baseline characteristics of the inverse probability weighted patient groups used for the comparative effectiveness analysis assessing patients with a non-LBBB QRS morphology.

| Variables                           | PR<230ms |        |                           | PR≥230ms |        |                           |
|-------------------------------------|----------|--------|---------------------------|----------|--------|---------------------------|
|                                     | ICD      | CRT    | % Standardized difference | ICD      | CRT    | % Standardized difference |
| Age (Mean)                          | 75       | 75.1   | -1.41                     | 77.1     | 77     | 1.58                      |
| Gender                              |          |        |                           |          |        |                           |
| Male                                | 80.40%   | 81.40% | -2.44                     | 89.90%   | 90.00% | -0.18                     |
| Female                              | 19.60%   | 18.60% | 2.44                      | 10.10%   | 10.00% | 0.18                      |
| Race                                |          |        |                           |          |        |                           |
| White non-Hispanic                  | 85.40%   | 86.10% | -1.87                     | 90.80%   | 89.90% | 2.99                      |
| Black non-Hispanic                  | 7.40%    | 7.50%  | -0.52                     | 4.60%    | 5.10%  | -2.26                     |
| Hispanic                            | 4.70%    | 4.30%  | 1.8                       | 2.90%    | 2.80%  | 0.39                      |
| Other                               | 2.50%    | 2.10%  | 2.77                      | 1.70%    | 2.20%  | -3.36                     |
| QRS duration                        |          |        |                           |          |        |                           |
| 120-129                             | 25.70%   | 26.30% | -1.49                     | 19.90%   | 19.80% | 0.13                      |
| 130-139                             | 20.70%   | 20.90% | -0.53                     | 18.10%   | 18.00% | 0.48                      |
| 140-149                             | 18.80%   | 18.00% | 1.97                      | 13.80%   | 15.30% | -4.24                     |
| 150-159                             | 14.30%   | 13.90% | 1.08                      | 17.30%   | 15.80% | 4.12                      |
| 160-169                             | 11.10%   | 11.40% | -1.06                     | 13.30%   | 12.90% | 1.26                      |
| ≥170                                | 9.50%    | 9.40%  | 0.22                      | 17.50%   | 18.20% | -1.82                     |
| Non-Ischemic Dilated Cardiomyopathy |          |        |                           |          |        |                           |
| No                                  | 80.60%   | 81.50% | -2.46                     | 80.90%   | 83.90% | -7.83                     |
| Yes-Within the past 9 months        | 7.40%    | 7.50%  | -0.4                      | 3.00%    | 4.60%  | -8.11                     |
| Yes-Greater than 9 months           | 12.00%   | 11.00% | 3.36                      | 16.10%   | 11.50% | 13.14                     |
| Ischemic HD                         | 82.30%   | 82.60% | -0.7                      | 79.10%   | 83.40% | -11.16                    |
| Atrial Fibrillation/Atrial Flutter  | 20.40%   | 20.60% | -0.5                      | 27.70%   | 27.70% | 0.01                      |
| Ventricular Tachycardia             | 20.50%   | 19.90% | 1.5                       | 24.80%   | 26.00% | -2.87                     |
| Primary prevention                  | 93.10%   | 92.40% | 2.67                      | 93.90%   | 92.10% | 7.32                      |
| NYHA class                          |          |        |                           |          |        |                           |
| I                                   | 7.20%    | 6.30%  | 3.8                       | 5.60%    | 8.30%  | -10.82                    |
| II                                  | 33.10%   | 35.50% | -4.94                     | 30.00%   | 29.70% | 0.56                      |
| III                                 | 57.80%   | 56.10% | 3.56                      | 62.90%   | 59.20% | 7.69                      |
| IV                                  | 1.80%    | 2.20%  | -2.64                     | 1.50%    | 2.80%  | -8.62                     |
| Previous PCI                        | 38.70%   | 39.80% | -2.22                     | 40.10%   | 37.80% | 4.73                      |
| Previous CABG                       | 52.40%   | 52.20% | 0.39                      | 57.80%   | 61.80% | -8.17                     |
| Diabetes                            | 40.70%   | 41.00% | -0.58                     | 41.90%   | 43.20% | -2.56                     |
| Previous MI                         | 67.50%   | 68.70% | -2.73                     | 66.00%   | 68.30% | -5.02                     |
| Chronic Lung Disease                | 26.20%   | 25.00% | 2.81                      | 21.20%   | 21.50% | -0.83                     |
| Cerebrovascular Disease             | 17.30%   | 17.40% | -0.41                     | 18.30%   | 19.40% | -2.79                     |
| Renal Failure-Dialysis              | 2.90%    | 3.20%  | -1.78                     | 3.40%    | 4.10%  | -3.59                     |
| Cardiac Arrest                      | 3.10%    | 2.90%  | 1.32                      | 3.10%    | 5.40%  | -11.39                    |
| Hypertension                        | 79.20%   | 78.90% | 0.78                      | 82.80%   | 84.90% | -5.55                     |
| Syncope                             | 11.40%   | 10.40% | 3.13                      | 13.10%   | 11.90% | 3.67                      |
| CHF Duration                        |          |        |                           |          |        |                           |
| No                                  | 14.50%   | 16.00% | -4.17                     | 11.70%   | 15.30% | -10.34                    |
| Less than 9 months                  | 24.50%   | 23.60% | 1.98                      | 21.70%   | 21.10% | 1.38                      |
| Greater than 9 months               | 61.00%   | 60.30% | 1.34                      | 66.60%   | 63.60% | 6.22                      |
| EF %                                | 25.6     | 25.6   | 0.67                      | 26       | 25.9   | 1.21                      |
| GFR                                 |          |        |                           |          |        |                           |
| ≥60                                 | 41.90%   | 43.80% | -3.75                     | 36.30%   | 40.10% | -7.68                     |
| 30-59                               | 49.10%   | 46.50% | 5.24                      | 53.80%   | 48.20% | 11.16                     |
| 15-29                               | 5.60%    | 5.80%  | -1.06                     | 6.40%    | 7.30%  | -3.55                     |

|                                         |        |        |       |        |        |       |
|-----------------------------------------|--------|--------|-------|--------|--------|-------|
| <15                                     | 3.40%  | 3.90%  | -2.77 | 3.40%  | 4.40%  | -4.85 |
| BUN Level                               |        |        |       |        |        |       |
| ≤ 20                                    | 41.90% | 44.00% | -4.29 | 31.60% | 31.90% | -0.46 |
| 20-40                                   | 48.60% | 46.90% | 3.48  | 56.00% | 54.00% | 4.16  |
| >40                                     | 9.50%  | 9.20%  | 1.32  | 12.30% | 14.20% | -5.49 |
| Sodium Level                            |        |        |       |        |        |       |
| ≤ 135                                   | 12.20% | 12.80% | -1.6  | 12.70% | 13.10% | -1.35 |
| 135-145                                 | 86.00% | 86.00% | -0.22 | 85.90% | 85.30% | 1.75  |
| >145                                    | 1.80%  | 1.20%  | 4.94  | 1.40%  | 1.60%  | -1.32 |
| Systolic BP                             |        |        |       |        |        |       |
| ≤ 100                                   | 5.50%  | 5.90%  | -1.65 | 4.20%  | 5.40%  | -5.73 |
| 100-130                                 | 40.80% | 40.60% | 0.38  | 42.50% | 39.50% | 6.2   |
| >130                                    | 53.70% | 53.50% | 0.4   | 53.30% | 55.10% | -3.66 |
| Angiotensin converting enzyme inhibitor | 59.90% | 59.50% | 0.7   | 58.30% | 57.80% | 1.05  |
| Amiodarone                              | 8.90%  | 8.70%  | 0.77  | 15.90% | 15.30% | 1.63  |
| Hydralazine                             | 4.00%  | 3.90%  | 0.48  | 3.60%  | 4.20%  | -2.95 |
| Angiotensin receptor blocker            | 19.80% | 20.30% | -1.15 | 20.10% | 21.10% | -2.45 |
| Aspirin                                 | 75.80% | 76.00% | -0.53 | 74.70% | 75.80% | -2.57 |
| Beta-blocker                            | 85.50% | 85.80% | -0.92 | 82.60% | 79.70% | 7.38  |
| Warfarin                                | 19.10% | 18.80% | 0.73  | 27.60% | 22.70% | 11.4  |
| Digoxin                                 | 21.00% | 20.10% | 2.16  | 21.30% | 23.70% | -5.68 |
| Diuretic                                | 65.50% | 65.70% | -0.57 | 71.60% | 72.00% | -0.86 |
| Long acting nitrate                     | 12.70% | 12.90% | -0.34 | 14.30% | 14.50% | -0.66 |
| Clopidogrel                             | 29.20% | 28.50% | 1.51  | 27.30% | 27.00% | 0.82  |
| Statin                                  | 71.90% | 72.60% | -1.65 | 73.90% | 75.40% | -3.49 |
| Dementia                                | 2.30%  | 3.60%  | -7.81 | 2.90%  | 2.70%  | 1.03  |
| Disability/frailty                      | 6.50%  | 6.90%  | -1.58 | 7.60%  | 8.50%  | -2.96 |
| EP operator ICD training                |        |        |       |        |        |       |
| Board-certified EP/EP fellowship        | 77.60% | 74.80% | 6.46  | 79.80% | 76.00% | 9.21  |
| Surgery board                           | 1.10%  | 1.00%  | 0.72  | 1.70%  | 3.10%  | -9.05 |
| Other                                   | 21.30% | 24.10% | -6.74 | 18.50% | 20.90% | -6.11 |
| Operator CRT volume                     |        |        |       |        |        |       |
| ≤20 implants/year                       | 57.40% | 59.20% | -3.75 | 55.40% | 57.70% | -4.73 |
| >20 implants/year                       | 42.60% | 40.80% | 3.75  | 44.60% | 42.30% | 4.73  |
| Region                                  |        |        |       |        |        |       |
| Other                                   | 2.40%  | 2.10%  | 1.99  | 2.60%  | 2.60%  | -0.32 |
| New England                             | 3.80%  | 3.70%  | 0.73  | 6.10%  | 3.40%  | 12.66 |
| Atlantic                                | 35.60% | 34.10% | 3.08  | 30.90% | 32.60% | -3.67 |
| Central                                 | 46.60% | 48.80% | -4.41 | 48.20% | 46.90% | 2.53  |
| Mountain                                | 4.20%  | 4.00%  | 0.95  | 3.00%  | 3.20%  | -1.39 |
| Pacific                                 | 7.50%  | 7.40%  | 0.43  | 9.30%  | 11.20% | -6.41 |
| Teaching status                         |        |        |       |        |        |       |
| Council of teaching hospitals           | 27.60% | 26.20% | 3.24  | 28.70% | 23.60% | 11.74 |
| Teaching hospital                       | 28.00% | 28.40% | -0.94 | 26.60% | 30.90% | -9.52 |
| Not teaching hospital                   | 44.40% | 45.40% | -2.04 | 44.70% | 45.50% | -1.69 |
| Center CRT volume                       |        |        |       |        |        |       |
| ≤20 implants/year                       | 11.10% | 12.50% | -4.28 | 8.80%  | 7.20%  | 6.02  |
| >20 implants/year                       | 88.90% | 87.50% | 4.28  | 91.20% | 92.80% | -6.02 |
| Beds set up and staffed                 |        |        |       |        |        |       |
| ≤100                                    | 5.70%  | 5.40%  | 1.45  | 5.50%  | 5.90%  | -1.51 |
| 100-500                                 | 60.60% | 62.00% | -2.79 | 64.40% | 66.10% | -3.59 |
| >500                                    | 33.70% | 32.70% | 2.18  | 30.10% | 28.10% | 4.54  |
| Implant year                            |        |        |       |        |        |       |
| 2006                                    | 16.80% | 16.80% | -0.04 | 16.20% | 16.10% | 0.31  |
| 2007                                    | 20.10% | 19.00% | 2.66  | 21.20% | 21.40% | -0.46 |
| 2008                                    | 20.60% | 22.90% | -5.48 | 18.70% | 20.40% | -4.25 |
| 2009                                    | 22.50% | 21.70% | 1.81  | 25.50% | 25.70% | -0.64 |
| 2010                                    | 20.00% | 19.50% | 1.18  | 18.40% | 16.40% | 5.37  |

BUN = blood urea nitrogen, BP = blood pressure, CABG = coronary artery bypass grafting, CHF = congestive heart failure, EF = ejection fraction, GFR = glomerular filtration rate, LBBB = left bundle branch block, MI = myocardial infarction, NYHA = New York Heart Association, PCI = percutaneous coronary intervention

| <b>Supplemental Table 5.</b> Association between CRT-D vs. ICD and falsification endpoints among all patients and among subgroups when stratified by PR interval and QRS characteristics. |                          |                      |         |                     |         |
|-------------------------------------------------------------------------------------------------------------------------------------------------------------------------------------------|--------------------------|----------------------|---------|---------------------|---------|
| Group                                                                                                                                                                                     | Outcome                  | PR < 230             |         | PR ≥ 230ms          |         |
|                                                                                                                                                                                           |                          | HR/SHR 95%CI         | P-value | HR/SHR 95%CI        | P-value |
| All patients                                                                                                                                                                              | Gastrointestinal Bleed   | 1.080 (0.935-1.247)  | 0.30    | 0.870 (0.659-1.150) | 0.33    |
|                                                                                                                                                                                           | Bone disorder / Fracture | 0.962 (0.880-1.053 ) | 0.40    | 0.998 (0.823-1.209) | 0.98    |
| Non-LBBB                                                                                                                                                                                  | Gastrointestinal Bleed   | 0.899 (0.732-1.104)  | 0.31    | 0.971 (0.633-1.491) | 0.89    |
|                                                                                                                                                                                           | Bone disorder / Fracture | 1.028 (0.892-1.186)  | 0.69    | 0.779 (0.579-1.047) | 0.10    |
| LBBB                                                                                                                                                                                      | Gastrointestinal Bleed   | 1.181 (0.969-1.439)  | 0.10    | 0.777 (0.531-1.136) | 0.19    |
|                                                                                                                                                                                           | Bone disorder / Fracture | 0.946 (0.846-1.058)  | 0.33    | 1.147 (0.864-1.524) | 0.34    |

**Supplemental Table 6.** Baseline characteristics of the inverse probability weighted subgroups constructed for the sensitivity analysis.

| Variables                           | PR<180ms |        |                           | 180≤PR<230ms |        |                           | PR≥230ms |        |                           |
|-------------------------------------|----------|--------|---------------------------|--------------|--------|---------------------------|----------|--------|---------------------------|
|                                     | ICD      | CRT    | % Standardized difference | ICD          | CRT    | % Standardized difference | ICD      | CRT    | % Standardized difference |
| Age (Mean)                          | 74.7     | 74.8   | -1.37                     | 75.4         | 75.5   | -0.92                     | 76.9     | 76.9   | -0.69                     |
| Gender                              |          |        |                           |              |        |                           |          |        |                           |
| Male                                | 58.60%   | 59.40% | -1.47                     | 68.20%       | 69.70% | -3.25                     | 80.30%   | 82.50% | -5.51                     |
| Female                              | 41.40%   | 40.60% | 1.47                      | 31.80%       | 30.30% | 3.25                      | 19.70%   | 17.50% | 5.51                      |
| Race                                |          |        |                           |              |        |                           |          |        |                           |
| White non-Hispanic                  | 85.2%    | 86.1%  | -2.66                     | 87.40%       | 87.40% | 0.02                      | 88.10%   | 89.60% | -4.48                     |
| Black non-Hispanic                  | 8.2%     | 7.5%   | 2.6                       | 7.10%        | 7.10%  | 0.24                      | 7.00%    | 5.90%  | 4.34                      |
| Hispanic                            | 4.6%     | 4.3%   | 1.27                      | 3.60%        | 3.70%  | -0.62                     | 3.60%    | 2.60%  | 5.45                      |
| Other                               | 2.0%     | 2.0%   | -0.22                     | 1.90%        | 1.90%  | 0.35                      | 1.30%    | 1.90%  | -4.72                     |
| QRS duration                        |          |        |                           |              |        |                           |          |        |                           |
| 120-129                             | 13.70%   | 14.10% | -1.08                     | 13.70%       | 13.60% | 0.26                      | 11.80%   | 12.40% | -1.8                      |
| 130-139                             | 15.40%   | 16.10% | -1.8                      | 13.70%       | 14.00% | -0.7                      | 15.20%   | 14.30% | 2.45                      |
| 140-149                             | 19.80%   | 19.70% | 0.36                      | 16.60%       | 16.40% | 0.58                      | 14.70%   | 15.30% | -1.78                     |
| 150-159                             | 19.50%   | 19.20% | 0.84                      | 17.40%       | 17.10% | 0.94                      | 15.80%   | 14.90% | 2.33                      |
| 160-169                             | 15.20%   | 15.90% | -1.9                      | 16.60%       | 17.40% | -2.07                     | 19.00%   | 17.20% | 4.6                       |
| ≥170                                | 16.30%   | 15.10% | 3.41                      | 21.80%       | 21.50% | 0.88                      | 23.60%   | 25.90% | -5.23                     |
| Intraventricular Conduction         |          |        |                           |              |        |                           |          |        |                           |
| Non-LBBB                            | 29.60%   | 30.00% | -0.97                     | 31.30%       | 32.10% | -1.65                     | 37.20%   | 37.70% | -1.02                     |
| LBBB                                | 70.40%   | 70.00% | 0.97                      | 68.70%       | 67.90% | 1.65                      | 62.80%   | 62.30% | 1.02                      |
| Non-Ischemic Dilated Cardiomyopathy |          |        |                           |              |        |                           |          |        |                           |
| No                                  | 62.00%   | 61.70% | 0.57                      | 64.10%       | 65.70% | -3.3                      | 70.70%   | 73.50% | -6.15                     |
| Yes-Within the past 9 months        | 12.80%   | 13.30% | -1.53                     | 9.90%        | 9.80%  | 0.02                      | 8.50%    | 7.50%  | 3.74                      |
| Yes-Greater than 9 months           | 25.20%   | 25.00% | 0.55                      | 26.00%       | 24.40% | 3.61                      | 20.80%   | 19.00% | 4.37                      |
| Ischemic Heart Disease              | 63.40%   | 63.80% | -0.82                     | 66.60%       | 67.50% | -1.98                     | 71.40%   | 74.70% | -7.26                     |
| Atrial Fibrillation/Atrial Flutter  | 14.90%   | 15.80% | -2.61                     | 18.80%       | 19.00% | -0.65                     | 27.70%   | 27.70% | 0.02                      |
| Ventricular Tachycardia             | 15.80%   | 16.50% | -2.04                     | 17.20%       | 16.80% | 1.05                      | 20.00%   | 20.10% | -0.28                     |
| Primary prevention                  | 94.60%   | 94.50% | 0.45                      | 94.90%       | 95.00% | -0.6                      | 94.40%   | 94.30% | 0.4                       |
| NYHA class                          |          |        |                           |              |        |                           |          |        |                           |
| I                                   | 4.60%    | 4.60%  | 0.31                      | 5.20%        | 5.60%  | -1.77                     | 4.20%    | 4.30%  | -0.32                     |
| II                                  | 24.50%   | 25.00% | -1.08                     | 23.90%       | 24.10% | -0.66                     | 24.50%   | 24.60% | -0.36                     |
| III                                 | 68.20%   | 67.60% | 1.13                      | 67.70%       | 67.70% | 0.05                      | 68.90%   | 68.00% | 1.95                      |
| IV                                  | 2.70%    | 2.80%  | -0.79                     | 3.20%        | 2.50%  | 3.98                      | 2.40%    | 3.10%  | -4.19                     |
| Previous PCI                        | 33.00%   | 32.00% | 2.23                      | 31.90%       | 33.10% | -2.47                     | 33.80%   | 34.20% | -0.96                     |
| Previous CABG                       | 34.80%   | 35.50% | -1.51                     | 41.90%       | 40.50% | 2.82                      | 48.20%   | 50.10% | -3.92                     |
| Diabetes                            | 36.50%   | 36.60% | -0.22                     | 38.30%       | 38.20% | 0.22                      | 44.90%   | 42.00% | 5.88                      |
| Previous MI                         | 48.20%   | 49.60% | -2.81                     | 52.90%       | 53.60% | -1.36                     | 54.10%   | 58.60% | -9.01                     |
| Chronic Lung Disease                | 25.70%   | 24.90% | 1.85                      | 22.30%       | 21.40% | 2.13                      | 18.80%   | 20.40% | -3.96                     |
| Cerebrovascular Disease             | 14.30%   | 14.10% | 0.49                      | 13.90%       | 15.40% | -4.18                     | 16.50%   | 17.60% | -2.98                     |
| Renal Failure-Dialysis              | 2.50%    | 2.80%  | -1.89                     | 2.40%        | 2.60%  | -1.18                     | 3.20%    | 3.20%  | -0.13                     |
| Cardiac Arrest                      | 2.40%    | 2.00%  | 2.81                      | 2.10%        | 2.00%  | 0.76                      | 1.50%    | 2.90%  | -9.68                     |
| Hypertension                        | 77.90%   | 77.10% | 1.73                      | 77.90%       | 78.70% | -2.02                     | 80.50%   | 80.20% | 0.81                      |
| Syncope                             | 11.20%   | 9.80%  | 4.54                      | 10.60%       | 10.70% | -0.24                     | 13.20%   | 11.00% | 6.68                      |
| CHF Duration                        |          |        |                           |              |        |                           |          |        |                           |
| No                                  | 9.7%     | 9.7%   | -0.23                     | 9.40%        | 10.20% | -2.64                     | 8.50%    | 9.20%  | -2.62                     |

|                                         |        |        |       |        |        |       |        |        |       |
|-----------------------------------------|--------|--------|-------|--------|--------|-------|--------|--------|-------|
| Less than 9 months                      | 28.5%  | 27.7%  | 1.69  | 24.20% | 24.00% | 0.25  | 22.70% | 22.70% | 0.12  |
| Greater than 9 months                   | 61.9%  | 62.6%  | -1.43 | 66.50% | 65.80% | 1.43  | 68.80% | 68.10% | 1.49  |
| EF %                                    | 24.4   | 24.6   | -3.69 | 24.5   | 24.8   | -3.92 | 25.2   | 25.2   | -1.04 |
| GFR                                     |        |        |       |        |        |       |        |        |       |
| ≥60                                     | 46.50% | 45.00% | 3.07  | 39.00% | 40.30% | -2.7  | 36.50% | 37.30% | -1.46 |
| 30-59                                   | 45.00% | 46.40% | -2.93 | 50.60% | 49.60% | 1.95  | 52.20% | 51.20% | 2.03  |
| 15-29                                   | 5.80%  | 5.50%  | 1.44  | 7.60%  | 7.00%  | 2.42  | 8.00%  | 8.20%  | -0.65 |
| <15                                     | 2.70%  | 3.10%  | -2.38 | 2.90%  | 3.10%  | -1.65 | 3.30%  | 3.40%  | -0.75 |
| BUN Level                               |        |        |       |        |        |       |        |        |       |
| ≤ 20                                    | 46.40% | 45.70% | 1.38  | 39.40% | 41.30% | -3.99 | 33.30% | 34.20% | -1.84 |
| 20-40                                   | 43.90% | 45.60% | -3.42 | 49.10% | 48.50% | 1.21  | 54.00% | 52.00% | 4.15  |
| >40                                     | 9.70%  | 8.60%  | 3.51  | 11.60% | 10.20% | 4.35  | 12.70% | 13.90% | -3.55 |
| Sodium Level                            |        |        |       |        |        |       |        |        |       |
| ≤ 135                                   | 12.80% | 12.40% | 1.47  | 12.90% | 12.70% | 0.54  | 12.70% | 13.10% | -1.17 |
| 135-145                                 | 85.60% | 86.40% | -2.34 | 85.70% | 85.90% | -0.64 | 85.60% | 85.20% | 0.94  |
| >145                                    | 1.50%  | 1.20%  | 2.81  | 1.40%  | 1.40%  | 0.36  | 1.70%  | 1.70%  | 0.46  |
| Systolic BP                             |        |        |       |        |        |       |        |        |       |
| ≤ 100                                   | 5.20%  | 5.20%  | 0.15  | 5.80%  | 5.50%  | 1.04  | 5.20%  | 5.10%  | 0.46  |
| 100-130                                 | 40.80% | 42.10% | -2.68 | 42.30% | 40.90% | 2.86  | 37.40% | 40.50% | -6.28 |
| >130                                    | 54.00% | 52.70% | 2.58  | 51.90% | 53.60% | -3.3  | 57.30% | 54.40% | 5.96  |
| Angiotensin converting enzyme inhibitor | 62.60% | 62.40% | 0.53  | 59.00% | 59.30% | -0.49 | 59.20% | 58.40% | 1.76  |
| Amiodarone                              | 6.60%  | 6.20%  | 1.63  | 9.10%  | 9.50%  | -1.5  | 15.40% | 14.90% | 1.53  |
| Hydralazine                             | 3.60%  | 3.70%  | -0.33 | 3.80%  | 3.60%  | 0.97  | 4.00%  | 4.60%  | -2.59 |
| Angiotensin receptor blocker            | 18.10% | 20.00% | -4.81 | 21.70% | 21.60% | 0.26  | 21.10% | 22.40% | -3.22 |
| Aspirin                                 | 70.80% | 72.00% | -2.85 | 69.40% | 72.80% | -7.7  | 70.50% | 72.50% | -4.52 |
| Beta-blocker                            | 85.70% | 86.70% | -3.04 | 86.80% | 87.40% | -1.86 | 83.40% | 84.80% | -3.63 |
| Warfarin                                | 14.80% | 15.10% | -0.68 | 17.80% | 17.60% | 0.46  | 24.10% | 23.60% | 1.1   |
| Digoxin                                 | 19.10% | 20.10% | -2.42 | 23.80% | 22.90% | 2.08  | 23.60% | 25.50% | -4.45 |
| Diuretic                                | 66.60% | 67.00% | -0.73 | 67.80% | 68.70% | -1.91 | 72.60% | 72.20% | 0.88  |
| Long acting nitrate                     | 12.40% | 11.60% | 2.35  | 11.10% | 11.40% | -1.13 | 12.20% | 13.40% | -3.42 |
| Clopidogrel                             | 24.20% | 24.10% | 0.1   | 24.80% | 23.70% | 2.74  | 22.20% | 23.80% | -3.67 |
| Statin                                  | 63.60% | 66.00% | -5.13 | 67.80% | 69.80% | -4.45 | 70.90% | 70.40% | 1     |
| Dementia                                | 2.20%  | 2.60%  | -2.11 | 2.80%  | 3.20%  | -2.33 | 2.80%  | 2.90%  | -0.82 |
| Disability/frailty                      | 6.90%  | 6.30%  | 2.47  | 6.30%  | 6.20%  | 0.46  | 7.00%  | 7.10%  | -0.16 |
| EP operator ICD training                |        |        |       |        |        |       |        |        |       |
| Board-certified EP/EP fellowship        | 79.30% | 78.10% | 2.94  | 80.10% | 79.10% | 2.6   | 82.40% | 80.70% | 4.47  |
| Surgery board                           | 1.10%  | 1.20%  | -0.44 | 1.30%  | 1.00%  | 2.53  | 1.00%  | 1.40%  | -3.59 |
| Other                                   | 19.60% | 20.70% | -2.88 | 18.50% | 19.90% | -3.35 | 16.60% | 17.90% | -3.55 |
| Operator CRT volume                     |        |        |       |        |        |       |        |        |       |
| ≤20 implants/year                       | 57.20% | 55.60% | 3.21  | 56.20% | 56.20% | -0.02 | 58.20% | 55.40% | 5.82  |
| >20 implants/year                       | 42.80% | 44.40% | -3.21 | 43.80% | 43.80% | 0.02  | 41.80% | 44.60% | -5.82 |
| Region                                  |        |        |       |        |        |       |        |        |       |
| Other                                   | 2.50%  | 2.50%  | -0.17 | 2.80%  | 2.50%  | 1.77  | 3.10%  | 2.90%  | 1.2   |
| New England                             | 4.30%  | 3.70%  | 2.92  | 4.50%  | 4.70%  | -0.91 | 5.00%  | 4.20%  | 3.68  |
| Atlantic                                | 36.20% | 33.60% | 5.5   | 34.90% | 33.50% | 3.06  | 36.00% | 32.10% | 8.27  |
| Central                                 | 45.40% | 48.30% | -5.81 | 44.80% | 46.80% | -3.91 | 44.20% | 48.10% | -7.84 |
| Mountain                                | 4.40%  | 4.20%  | 0.81  | 4.60%  | 4.30%  | 1.73  | 3.80%  | 4.00%  | -0.96 |
| Pacific                                 | 7.20%  | 7.60%  | -1.65 | 8.30%  | 8.30%  | 0.16  | 7.90%  | 8.70%  | -2.92 |
| Teaching status                         |        |        |       |        |        |       |        |        |       |
| Council of teaching hospitals           | 28.20% | 28.00% | 0.56  | 28.50% | 28.40% | 0.05  | 30.10% | 26.70% | 7.46  |
| Teaching hospital                       | 29.10% | 28.40% | 1.46  | 26.50% | 28.10% | -3.49 | 26.20% | 28.80% | -5.96 |
| Not teaching                            | 42.70% | 43.60% | -1.84 | 45.00% | 43.50% | 3.09  | 43.80% | 44.50% | -1.42 |

|                                                                                                                                                                                                                                                                                                                                   |        |        |       |        |        |       |        |        |       |
|-----------------------------------------------------------------------------------------------------------------------------------------------------------------------------------------------------------------------------------------------------------------------------------------------------------------------------------|--------|--------|-------|--------|--------|-------|--------|--------|-------|
| hospital                                                                                                                                                                                                                                                                                                                          |        |        |       |        |        |       |        |        |       |
| Center CRT volume                                                                                                                                                                                                                                                                                                                 |        |        |       |        |        |       |        |        |       |
| ≤20 implants/year                                                                                                                                                                                                                                                                                                                 | 9.70%  | 10.00% | -1.17 | 10.20% | 10.20% | -0.06 | 7.30%  | 7.90%  | -2.31 |
| >20 implants/year                                                                                                                                                                                                                                                                                                                 | 90.30% | 90.00% | 1.17  | 89.80% | 89.80% | 0.06  | 92.70% | 92.10% | 2.31  |
| Beds set up and staffed                                                                                                                                                                                                                                                                                                           |        |        |       |        |        |       |        |        |       |
| ≤100                                                                                                                                                                                                                                                                                                                              | 5.20%  | 5.70%  | -2.09 | 4.90%  | 5.10%  | -0.89 | 4.40%  | 5.90%  | -6.6  |
| 100-500                                                                                                                                                                                                                                                                                                                           | 60.10% | 60.00% | 0.04  | 61.60% | 60.60% | 2.12  | 64.80% | 62.10% | 5.6   |
| >500                                                                                                                                                                                                                                                                                                                              | 34.70% | 34.20% | 0.96  | 33.50% | 34.30% | -1.77 | 30.80% | 32.00% | -2.67 |
| Implant year                                                                                                                                                                                                                                                                                                                      |        |        |       |        |        |       |        |        |       |
| 2006                                                                                                                                                                                                                                                                                                                              | 18.0%  | 17.5%  | 1.25  | 18.20% | 17.70% | 1.08  | 19.80% | 18.20% | 4.11  |
| 2007                                                                                                                                                                                                                                                                                                                              | 20.1%  | 19.3%  | 1.93  | 19.20% | 18.70% | 1.37  | 19.80% | 21.80% | -4.73 |
| 2008                                                                                                                                                                                                                                                                                                                              | 20.6%  | 22.4%  | -4.6  | 20.00% | 21.80% | -4.3  | 21.10% | 21.10% | 0.02  |
| 2009                                                                                                                                                                                                                                                                                                                              | 21.8%  | 21.0%  | 1.83  | 22.20% | 22.30% | -0.29 | 19.30% | 21.10% | -4.57 |
| 2010                                                                                                                                                                                                                                                                                                                              | 19.6%  | 19.7%  | -0.26 | 20.40% | 19.50% | 2.3   | 20.00% | 17.80% | 5.45  |
| <p>BUN = blood urea nitrogen, BP = blood pressure, CABG = coronary artery bypass grafting, CHF = congestive heart failure, EF = ejection fraction, GFR = glomerular filtration rate, LBBB = left bundle branch block, MI = myocardial infarction, NYHA = New York Heart Association, PCI = percutaneous coronary intervention</p> |        |        |       |        |        |       |        |        |       |



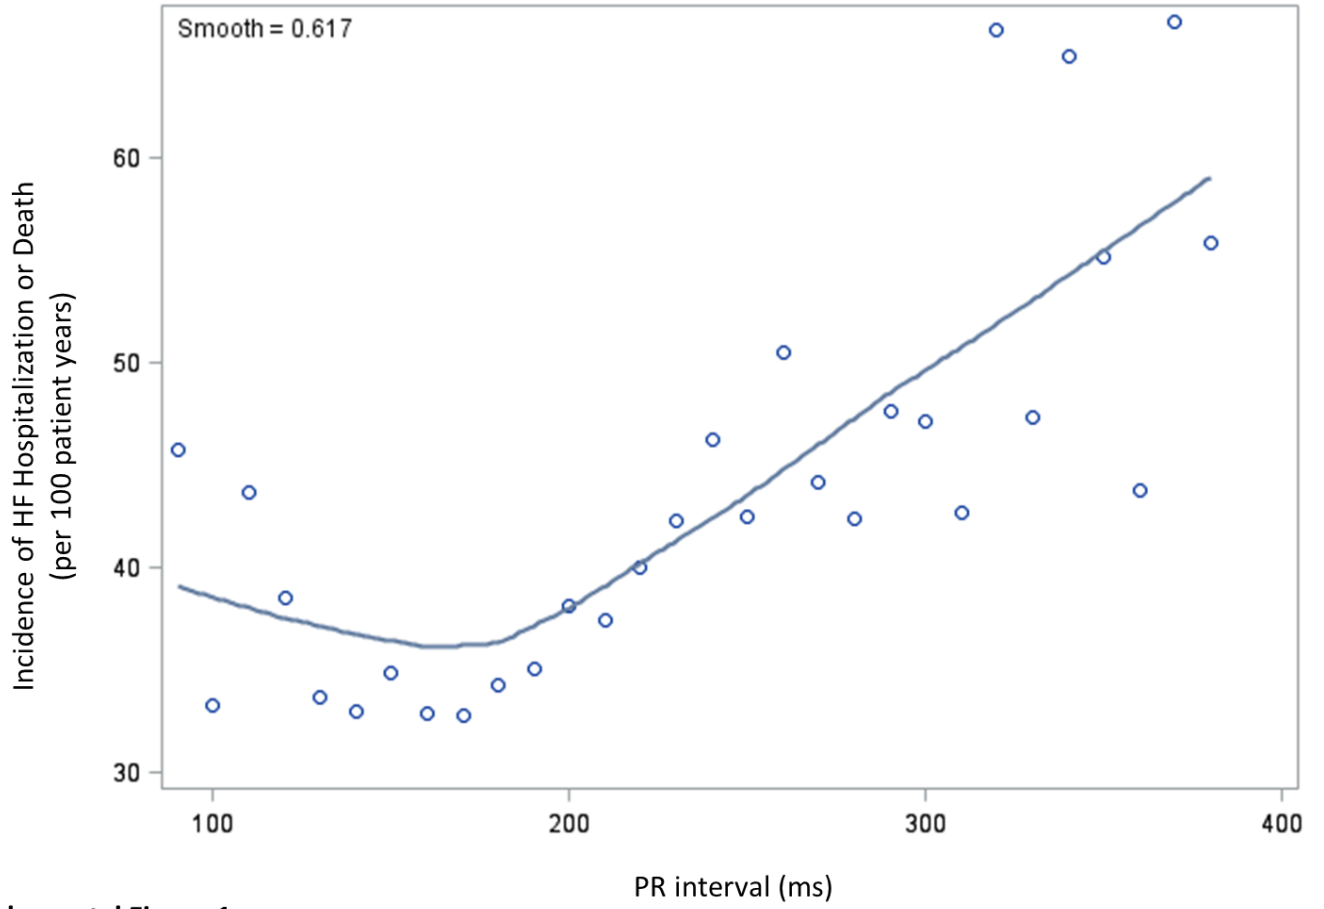

Supplemental Figure 1

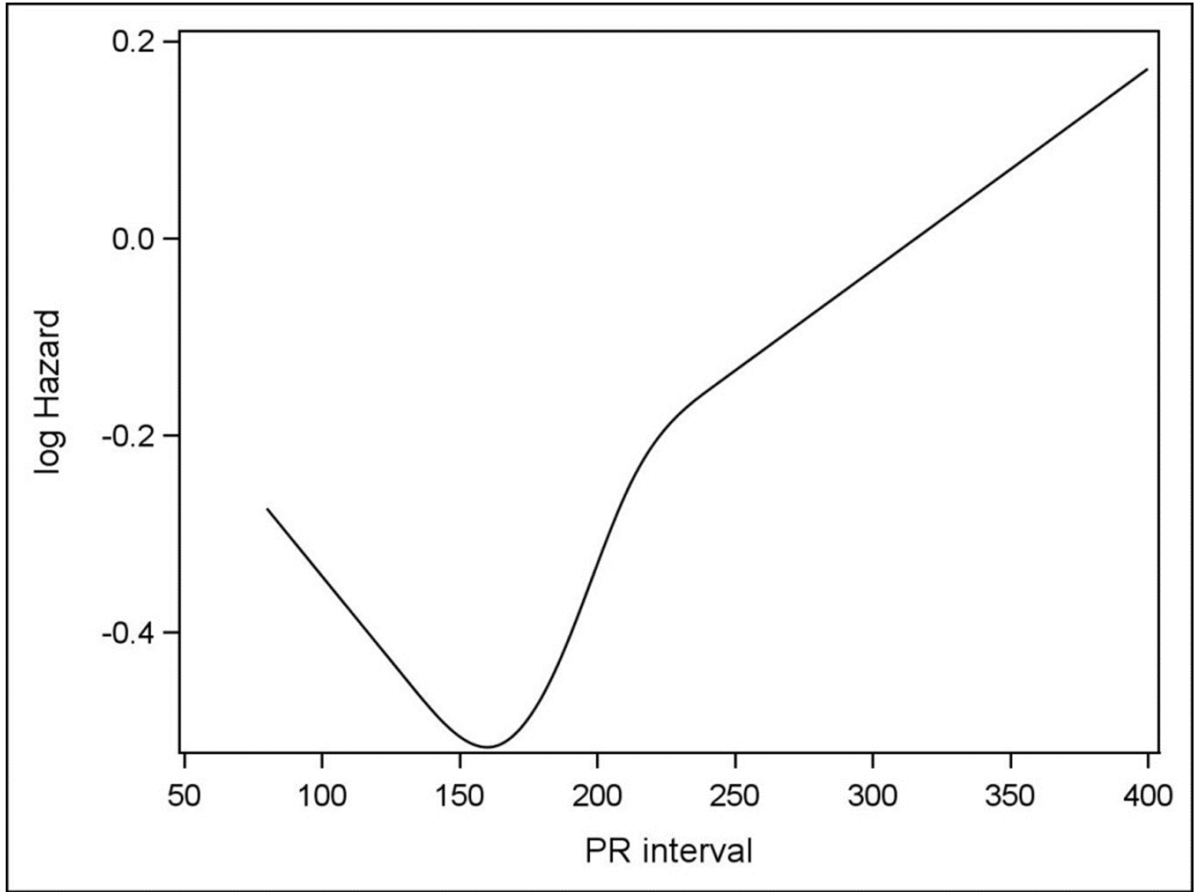

Supplemental Figure 2a

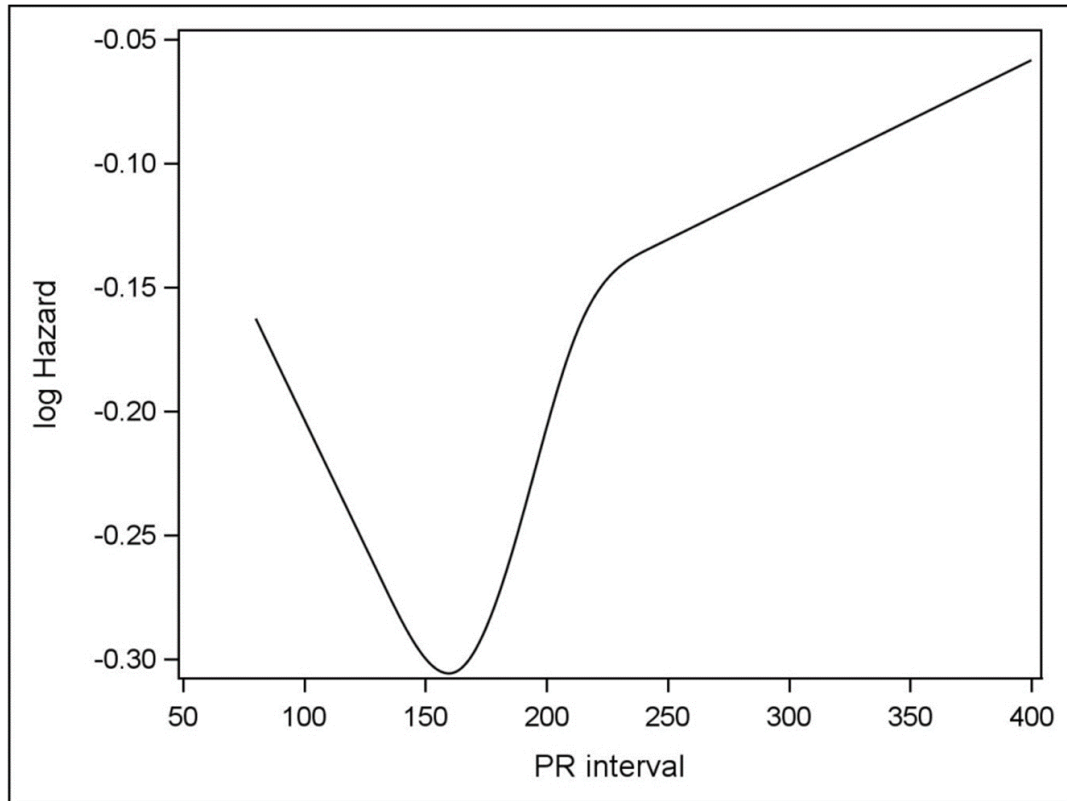

Supplemental Figure 2b

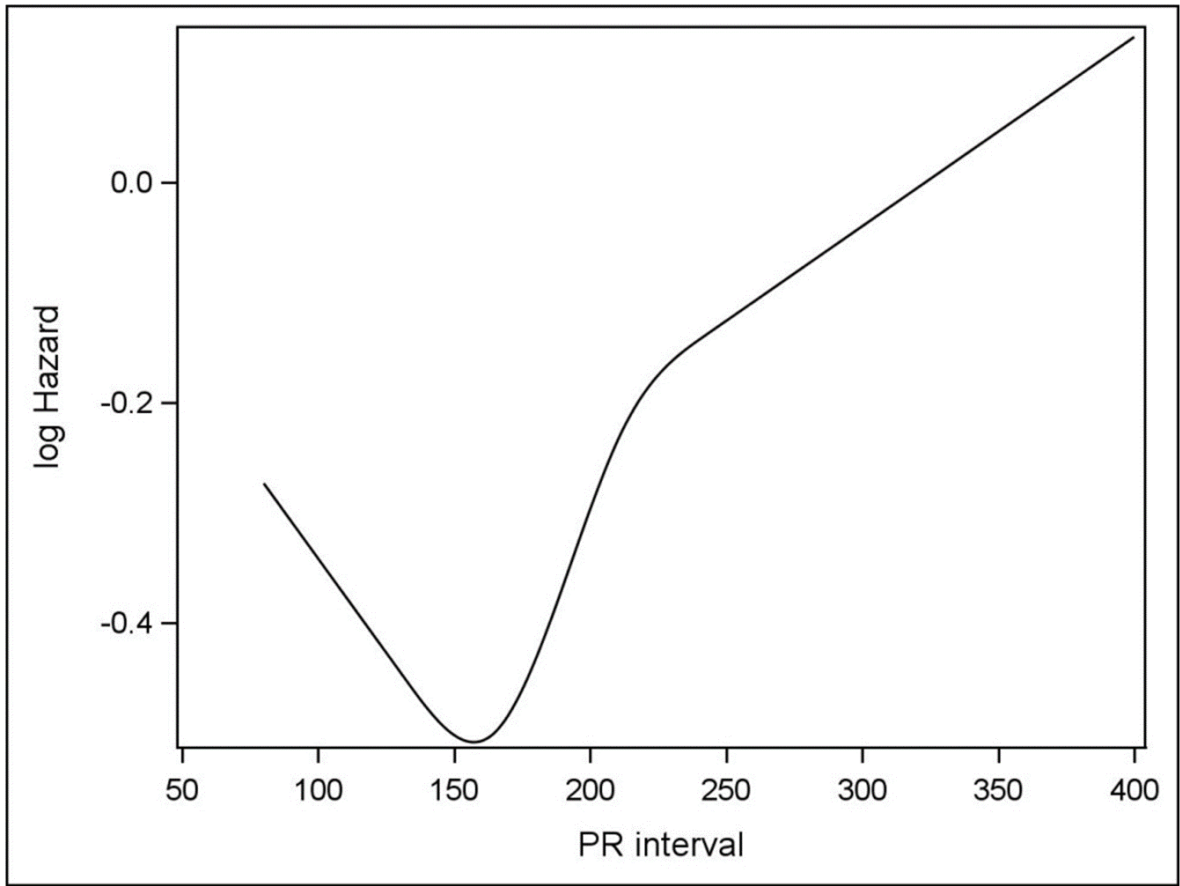

Supplemental Figure 2c

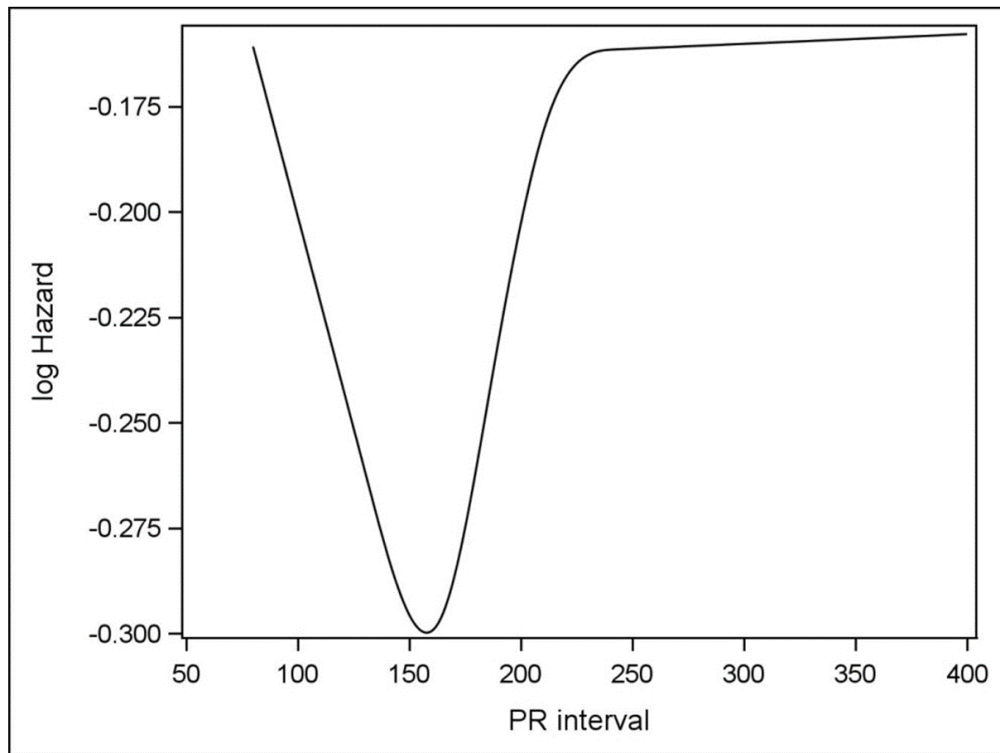

Supplemental Figure 2d

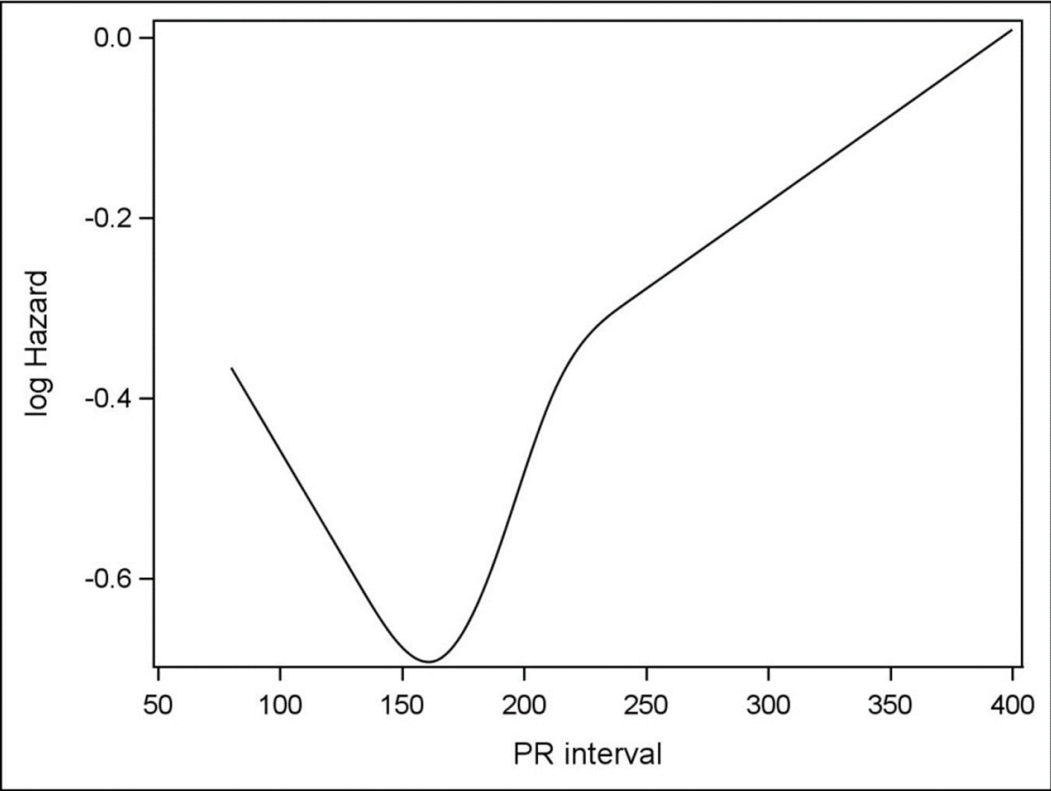

Supplemental Figure 2e

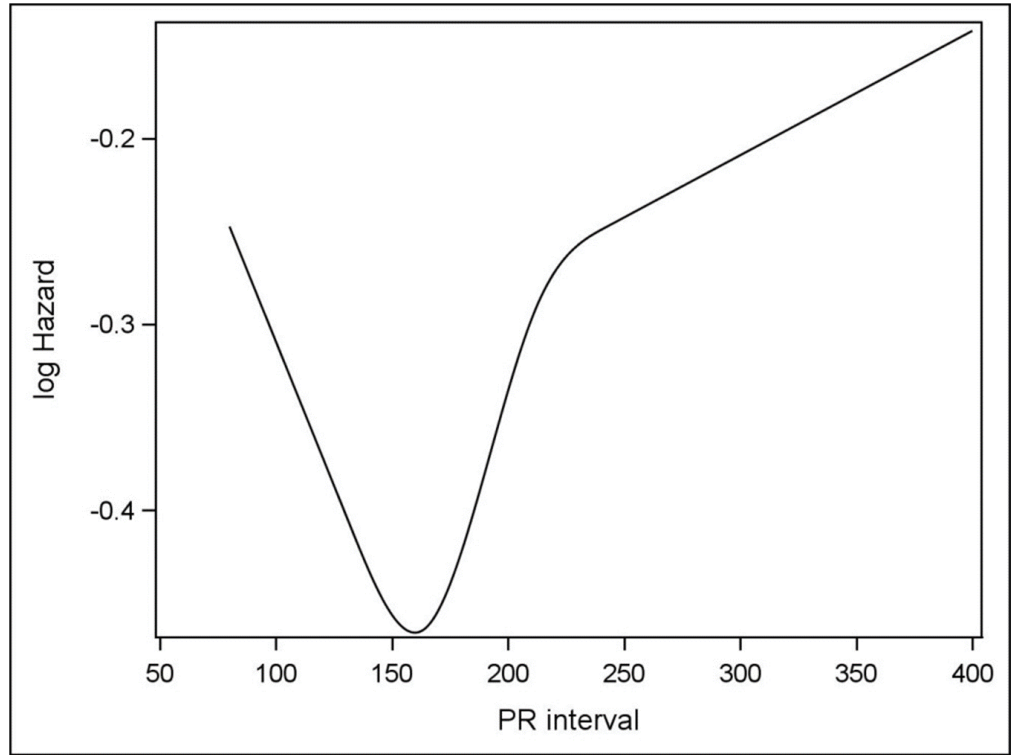

Supplemental Figure 2f
